# Supplementary material
Source: PubMed Central journal article supplement (PMC7202855)
Supplement: mmc1.pdf [file mmc1.pdf]

# THE LANCET

## Child & Adolescent Health

### Supplementary appendix

This appendix formed part of the original submission and has been peer reviewed. We post it as supplied by the authors.

Supplement to: Shenker N, on behalf of the Virtual Collaborative Network of Human Milk Banks and Associations. Maintaining safety and service provision in human milk banking: a call to action in response to the COVID-19 pandemic. *Lancet Child Adolesc Health* 2020; published online May 6. [https://doi.org/10.1016/S2352-4642\(20\)30134-6](https://doi.org/10.1016/S2352-4642(20)30134-6).

**\* Virtual Collaborative Network of Human Milk Banks and Associations contributors:**

| Country   | Name                   | Qualifications                           | Role, where known                                                     | Address                                                                                                                                                                                         |
|-----------|------------------------|------------------------------------------|-----------------------------------------------------------------------|-------------------------------------------------------------------------------------------------------------------------------------------------------------------------------------------------|
| Australia | Vanessa Clifford       | MBBS, BMedSc, MA, MPH, PhD, FRCPA, FRACP | Clinical Lead                                                         | Australian Red Cross Lifeblood, Level 3, 417 St Kilda Road, Melbourne, Victoria                                                                                                                 |
| Australia | Christine Sulfaro      | RN                                       | Milk Bank Manager                                                     | Australian Red Cross Lifeblood, Level 3, 417 St Kilda Road, Melbourne, Victoria                                                                                                                 |
| Australia | Gillian Opie           | MD                                       | Neonatal Paediatrician, Head of Unit                                  | Mercy Health Breastmilk Bank, Melbourne                                                                                                                                                         |
| Australia | Laura Klein            | PhD                                      | Research Fellow                                                       | Australian Red Cross Lifeblood, Level 3, 417 St Kilda Road, Melbourne, Victoria                                                                                                                 |
| Brazil    | Joao Aprigio           | MD                                       | Coordinator, Full Professor                                           | Ibero-American Human Milk Bank Program; National Milk Bank Service of Brazil; Fernandes Figueira Institute, Oswaldo Cruz Foundation - FIOCRUZ, Ministry of Health                               |
| Canada    | Frances Jones          | RN, MSN, IBCLC                           | Executive Director, Past President, HMBANA                            | British Columbia Women's Mothers' Milk Bank, Vancouver                                                                                                                                          |
| Canada    | Janette Festival       | RN, INCLC                                | Executive Director                                                    | Northern Star Mothers Milk Bank, Calgary, Alberta                                                                                                                                               |
| China     | Xihong Liu             | MD                                       | Director of Clinical Nutrition                                        | Guangzhou Women and Children Medical Center                                                                                                                                                     |
| Croatia   | Branka Golubić-Čepulić | MD                                       | Head of Dept of Transfusion Medicine                                  | Department of Transfusion Medicine and Transplant Biology, Clinical Hospital Centre, Zagreb                                                                                                     |
| Denmark   | Anne Bille Olin        | RD                                       | Lead Clinical Dietician                                               | Children's Department, Women's Milk Center, Hvidovre Hospital, Kvindemælcentralen afs. 529, Kettegård Allé 30, 2650 Hvidovre                                                                    |
| Estonia   | Annika Tiit            | MD                                       | Clinical Director                                                     | Human Milk Bank, East Tallinn Central Hospital                                                                                                                                                  |
| France    | Claude Billeaud        | MD, MSc, Dr of Science and Nutrition     | President AEEP, Asst Clin Director of Paediatrics, Scientific Manager | Marmande Human Milk Bank, Association Européenne pour l'Enseignement en Pédiatrie, University of Bordeaux                                                                                       |
| France    | Rachel Buffin          | MD, Neonatologist                        | Neonatologist in Charge of the Lactarium/Human Milk Bank              | 13 Auvergne Rhone Alpes regional Human Milk Bank, Lyon, France; Médecin du Lactarium Régional Rhône Alpes, Hôpital de la Croix Rousse, 103, grande rue de la Croix Rousse, 69317, Lyon Cedex 04 |
| Germany   | Daniel Klotz           | MD                                       | Head of Neonatology                                                   | Center for Pediatrics, Division of Neonatology and Pediatric Intensive Care Medicine, Medical Center – University of Freiburg, Faculty of Medicine, University of Freiburg, Freiburg            |
| India     | Adhisivam Bethou       | MD                                       | Ass Prof and Head of Dept                                             | Dept. of Neonatology JIPMER, Pondicherry 605006                                                                                                                                                 |
| India     | Himabindu Singh        | MD                                       | Clinical Director                                                     | Human Milk Bank, Osmania Medical College                                                                                                                                                        |
| India     | Jai Singh              | MD                                       | President                                                             | Monitoring and Mentoring Committee, Human Milk Banks, Rajasthan                                                                                                                                 |
| India     | Jayendra Kasar         | MD                                       | Clinical Director                                                     | Centre for Health Research and Innovation (CHRI)                                                                                                                                                |

|         |                          |                              |                                                                                            |                                                                                                                                               |
|---------|--------------------------|------------------------------|--------------------------------------------------------------------------------------------|-----------------------------------------------------------------------------------------------------------------------------------------------|
| India   | Kajal Jain               | MD                           | Clinical Director                                                                          | Human Milk Bank Lead, AIIMS, Delhi                                                                                                            |
| India   | Ketan Bharadva           | MD                           | President Elect                                                                            | Human Milk Banking Association (India); Human Milk Donation Camps of Surat Pediatric Association                                              |
| India   | Poonam Singh             | MD                           | Clinical Director                                                                          | Neonatologist, Surat Milk Bank, Gujarat                                                                                                       |
| India   | Pratibha Kale            | MD                           | Clinical Director                                                                          | Human Milk Bank, Amravati                                                                                                                     |
| India   | Roopa Bellard            | MD                           | Clinical Director                                                                          | NJ Medical College, Karnataka, India                                                                                                          |
| India   | Ruchika Chugh Sachdeva   | MSc (Nutr)                   | Deputy Director                                                                            | Maternal Newborn Child Health and Nutrition; PATH India, Gopaldas Bhawan Building, Connaught Place, New Delhi 110001                          |
| India   | Satish Tiwari            | MD                           | Current President, Human Milk BANKing Association of India                                 | Professor of Pediatrics, Indian College of Maternal and Child Health, Dr Punjabrao Deshmukh Memorial Medical College, Amravati, Maharashtra   |
| India   | Selvaraj Jayaraman       | MD                           | Professor, State Advisor                                                                   | Saveetha Hospital, Tamil Nadu                                                                                                                 |
| India   | Sila Deb                 | MD                           | Deputy Commissioner, Child Health                                                          | Ministry of Health and Family Welfare                                                                                                         |
| India   | Suchandra Mukherjee      | MD                           | Clinical Director                                                                          | Human Milk Bank Lead, Kolkota                                                                                                                 |
| India   | Sushma Nangia            | MD, DM (Neonatology - AIIMS) | Director, Professor & Head, Department of Neonatology; Convener, National Human Milk Bank. | Lady Hardinge Medical College & Kalawati Saran Children's Hospital, New Delhi 110001                                                          |
| India   | Suksham Jain             | MD                           | Neonatologist                                                                              | Government Medical College Hospital, Chandigarh                                                                                               |
| Iran    | Mohammad Bagher Hosseini | MD                           | Assoc Professor Neonatology Dept, Milk Bank Director                                       | Dept. Neonatology, Tabriz University of Medical Sciences, Neonatal and Perinatal Department, Alzahra Teaching Hospital, Artesh Avenue, Tabriz |
| Iran    | Mohammad Heidarzadeh     | MD                           | Director of Neonatal Office                                                                | Ministry of Health; Tabriz University of Medical Sciences                                                                                     |
| Iran    | Maryam Saboute           | MD                           | Clinical Director                                                                          | Human Milk Bank of Shahid Akbarabadi Hospital of Tehran                                                                                       |
| Ireland | Tanya Cassidy            | PhD, MA                      |                                                                                            | School of Nursing, Psychotherapy, and Community Health, Dublin City University                                                                |
| Italy   | Enrico Bertino           | MD                           | President, EMBA; Professor of Neonatology                                                  | Università degli Studi di Torino   UNITO · Dipartimento di Scienze della Sanità Pubblica e Pediatriche                                        |
| Italy   | Guido Moro               | MD                           | Professor of Neonatology (ret), President AIBLUD                                           | Italian Association of Donated Human Milk Banks (AIBLUD); Biomedica, Via Libero Temolo No 4, 20126, Milan                                     |
| Kenya   | Angela Kithua            | MSc (Nut)                    | Nutrition Program Associate                                                                | PATH, supporting the Pumwani Maternity Hospital                                                                                               |
| Kenya   | Faith Njeru              | RN                           | Paediatric Nurse                                                                           | Pumwani Maternity Hospital Lactation Support Center and Human Milk Bank, Nairobi                                                              |
| Kenya   | Mary Waiyego             | MD                           | Clinical Director                                                                          | Pumwani Maternity Hospital Lactation Support Center and Human Milk Bank, Nairobi                                                              |

|              |                             |         |                                                                                                        |                                                                                                                                                            |
|--------------|-----------------------------|---------|--------------------------------------------------------------------------------------------------------|------------------------------------------------------------------------------------------------------------------------------------------------------------|
| Myanmar      | Nant San San Aye            | MD      | Professor of Neonatology                                                                               | Central Women's Hospital, Yangon                                                                                                                           |
| Myanmar      | San San Myint               | MD      | Former Prof Neonatology, Milk Bank Founder                                                             | Central Women's Hospital, Yangon                                                                                                                           |
| Myanmar      | Zaw Win Moe                 | MD      | Clinical Director                                                                                      | Yankin Children's Hospital, Yangon                                                                                                                         |
| New Zealand  | Anthea Franks               | RN      | Milk Bank Manager                                                                                      | Human Milk Bank, Neonatal Unit, Christchurch Women's Hospital                                                                                              |
| Norway       | Anne Hagen Grøvslien        |         | Milk Bank Manager, Norwegian Accredited Breastfeeding Consultant, Multi-cultural Healthcare Consultant | Oslo University Hospital                                                                                                                                   |
| Norway       | Anne Bærug                  | PhD     | Consultant                                                                                             | Norwegian National Advisory Unit on Breastfeeding, Oslo, Norway                                                                                            |
| Philippines  | Estrella J. Olonan-Jusi     | MD, MPM | Human Milk Bank Director; President                                                                    | Human Milk Bank Association of the Philippines; Dr. Jose Fabella Memorial Hospital                                                                         |
| Poland       | Aleksandra Wesolowska       | PhD     | Director                                                                                               | The Human Milk Bank Foundation; Laboratory of Human Milk and Lactation Research at Regional Human Milk Bank in Holy Hospital, Medical University of Warsaw |
| Serbia       | Radmila Mileusnic-Milenovic | MD      | Neonatologist                                                                                          | First Serbian Human Milk Bank, Institute of Neonatology, Belgrade                                                                                          |
| Slovenia     | Andreja Domjan              | MD      | Consultant Paediatrician, Director                                                                     | Human Milk Bank, Ljubljana Maternity Hospital, Ljubljana                                                                                                   |
| South Africa | Anna Coutsoudis             | PhD     | Professor Emeritus                                                                                     | HMBASA, School of Clinical Medicine, University of KwaZulu-Natal, Durban                                                                                   |
| South Africa | Penny Reimers               | PhD     | Advisor; iThemba Lethu Milk Bank, Durban                                                               | Human Milk Banking Association of South Africa; Advisor, iThemba Lethu Community Milk Bank, P.O. Box 41138, Rossburgh, 4072, KwaZulu Natal                 |
| South Africa | Jenny Wright                |         | CEO                                                                                                    | Milk Matters, Human Milk Bank, Cape Town, South Africa; Board of HMBASA (Human Milk Banking Association of South Africa)                                   |
| Spain        | Antoni Gaya                 | MD, PhD | Director, Tissue Bank                                                                                  | Fundació Banc de Sang i Teixits de les Illes Balears, Institut d'Investigacions Sanitaries Illes Balears (IDISBA), Palma                                   |
| Spain        | Nadia Garcia-Lara           | MD      | Neonatologist                                                                                          | 12 Octubre Hospital Regional Milk Bank, Madrid                                                                                                             |
| Sweden       | Josefin Lundstrom           | MD      | Neonatologist                                                                                          | Sachsska Children's and Youth Hospital                                                                                                                     |
| Taiwan       | Florence Leefang Fanglee    | MD      | Medical Director, Human Milk Bank, Head of Neonatal Unit                                               | Taipei City Hospital Milk Bank, Taipei                                                                                                                     |
| Taiwan       | Yungchieh Lin (Apple)       | MD      | Medical Director Human Milk Bank, Neonatologist                                                        | Southern Milk Bank                                                                                                                                         |
| Thailand     | Sopapan Ngerncham           | MD      | Associate Professor in Pediatrics                                                                      | Division of Neonatology, Department of Pediatrics, Faculty of Medicine Siriraj Hospital, Mahidol University, Bangkok                                       |

|                 |                          |                |                                                                               |                                                                                                                                                                |
|-----------------|--------------------------|----------------|-------------------------------------------------------------------------------|----------------------------------------------------------------------------------------------------------------------------------------------------------------|
| The Netherlands | J B (Hans) van Goudoever | MD             | Professor of Paediatrics,                                                     | Amsterdam UMC, Vrije Universiteit, University of Amsterdam, Emma Children's Hospital, Amsterdam, The Netherlands                                               |
| Turkey          | Sertac Arslanoglu        | MD, PhD        | Professor Neonatology, Vice-President EMBA                                    | Director, Dr Behcet Uz Children's Hospital, Izmir                                                                                                              |
| UK              | Marta Staff              | MBA            | PhD student                                                                   | The Centre for Simulation, Analytics and Modelling (CSAM), University of Exeter Business School, Exeter EX4 4PU                                                |
| UK              | Natalie Shenker          | MD, PhD        | Co-founder and Director, UKRI Future Leaders Fellow                           | The Human Milk Foundation; Imperial College London, London W12 0HS                                                                                             |
| UK              | Gillian Weaver           | BSc (Nut), RD  | Co-founder and International Milk Banking Consultant                          | The Human Milk Foundation, Rothamsted Institute, Herts, AL5 2JQ                                                                                                |
| UK              | Jackie Hughes            | RN             | Chair, UK Association for Milk Banking                                        | Northwest Human Milk Bank, Chester                                                                                                                             |
| UK              | Debbie Barnett           | RN             | Manager                                                                       | Scottish National Milk Bank Service, Glasgow                                                                                                                   |
| USA             | Amy Vickers              | MSN, RN, IBCLC | Current President HMBANA and Executive Director Mother's Milk Bank of N Texas | Executive Director, Mothers' Milk Bank of North Texas; President, Board of Directors, HMBANA                                                                   |
| USA             | Aunchalee Palmquist      | PhD, MA, IBCLC | Assistant Professor                                                           | Carolina Global Breastfeeding Institute, Department of Maternal and Child Health, University of North Carolina-Chapel Hill, Chapel Hill, North Carolina, 27599 |
| USA             | Erin H Spence            | MD             | Neonatologist, Co-Medical Director                                            | Mother's Milk Bank of North Texas, 7617 Benbrook Parkway, Fort Worth, Texas 76126                                                                              |
| USA             | Naomi Bar Yam            | PhD            | Director                                                                      | Mother's Milk Bank Northeast, 377 Elliot St, Newton Upper Falls, MA 02464                                                                                      |
| USA             | Laraine Lockhart Borman  | IBCLC          | Director of Outreach, Milk Bank                                               | Director, Mothers' Milk Bank, Rocky Mountain Hospital for Children, 1719 E, 19th Ave, Denver CO 80218                                                          |
| USA             | Lindsay Groff            | MBA            | Executive Director                                                            | Human Milk Banking Association of North America (HMBANA), 455 Camp Bowie Blvd. Suite 114-88, Fort Worth, TX76107                                               |
| USA             | Naomi Bar Yam            | PhD            | Director                                                                      | Mother's Milk Bank Northeast, 377 Elliot St, Newton Upper Falls, MA 02464                                                                                      |
| USA             | Pauline Sakamoto         | MS, RN, PHN    | Past HMBANA President                                                         | Operations and Regulatory Consultant, San Jose Mothers' Milk Bank, HMBANA                                                                                      |
| USA             | Sybil Sanchez            | MIA, CLC       | Associate Director                                                            | Human Milk Banking Association of North America (HMBANA), 455 Camp Bowie Blvd. Suite 114-88, Fort Worth, TX76107                                               |
| PATH            | Kiersten Israel-Ballard  | MPH, DrPH      | Associate Director                                                            | Maternal, newborn, child health and nutrition; PATH, 2201 Westlake Avenue, Suite 200, Seattle, WA 98121                                                        |
| PATH            | Kimberly Mansen          | MSPH RDN       | Program Officer                                                               | Maternal, newborn, child health and nutrition; PATH, 2201 Westlake Avenue, Suite 200, Seattle, WA 98121                                                        |
| Vietnam         | Tran Thi Hoang           | MD, PhD        | Vice-Director                                                                 | Human Milk Bank, Da Nang Hospital for Women and Children, Da Nang                                                                                              |
